# Supplementary material
Source: Elsevier journal article supplement (https://www.sciencedirect.com/science/article/pii/S2013251422000426)
Supplement: mmc1 [file S2013251422000426:mmc1.doc]

Content

[Annex 1. PROFESSIONAL PROFILE OF THE AUTHORS OF THE GUIDE 1](#_Toc86765375)

[Annex 2. DECLARATION OF CONFLICTS OF INTEREST 1](#_Toc86765376)

[Annex 3. REQUEST FOR TEMPORARY DIALYSIS CARE 1](#_Toc86765377)

[Annex 4. MEDICAL CLINICAL REPORT 2](#_Toc86765378)

[Annex 5. NURSING REPORT 3](#_Toc86765379)

[Annex 6. DISPLACED PATIENTS ACCEPTANCE / REJECTION DOCUMENT 4](#_Toc86765380)

[Annex 7. GLOBAL INDICATORS 6](#_Toc86765381)

[Annex 8. MODIFIED CHARLSON INDEX 13](#_Toc86765382)

[Annex 9. SELECTING A TARGET KT ACCORDING TO BSA BASED ON EQ. (1). 16](#_Toc86765383)

[Annex 10. LIST OF ADVERSE EVENTS 16](#_Toc86765384)

Annex 1. PROFESSIONAL PROFILE OF THE AUTHORS OF THE GUIDE

**Alcalde Bezhold, Guillermo**

Araba University Hospital. Araba Integrated Healthcare Organization, Osakidetza. Vitoria-Gasteiz, Álava.

Head of the Nephrology Service, Araba University Hospital.

Associate Professor of the Department of Medicine, University of the Basque Country.

**ALCÁZAR ARROYO, ROBERTO**

Infanta Leonor University Hospital, Madrid.

Clinical nephrologist at the Infanta Leonor University Hospital, Madrid.

Editor-in-chief of the journal Nefrología (Nephrology).

Editor of the journal nefroPLUS.

**ANGOSO DE GUZMÁN, MANUEL**

Vithas Consuelo Hospital, Valencia.

Head of the Nephrology Service, Vithas Consuelo Hospital

Certified Qualified in the Specialty of Internal Medicine by the American Board of Internal Medicine, September 1989.

Certified in Nephrology by the American Board of Internal Medicine in 1996.

**ARIAS, MARTA**

Clinical Hospital, Barcelona.

A graduate of the Faculty of Medicine of Santander in 2001, she held a Residency in the Nephrology and Renal Transplant Service at the Clinical Hospital of Barcelona from 2003 to 2007. She later joined the dialysis department of that hospital, where she currently works. She has taken an active role in various projects related to online hemodiafiltration, biofeedback sensors and electric bioimpedance to evaluate the state of hydration and nutrition of patients on dialysis, her main areas of interest being hemodialysis dosage, adequacy of dialysis, and identification of new uremic toxins through proteomic analysis and nutrition.

She is a member of the Spanish and Catalan Nephrology Society, and the Catalan Nutrition in Dialysis Group and she has over 30 original publications, 5 revisions, over 100 abstracts for national and international conferences and 8 chapters of books to her credit.

She teaches on the Master in Hemodialysis for Nephrology Specialists in Madrid and the Master in Nutrition and Metabolism at the University of Barcelona.

**ARENAS, MARIA DOLORES**

Head of the Clinical Nephrology and Dialysis department at the Hospital del Mar in Barcelona, she holds a Doctorate in medicine and surgery from the Faculty of Medicine at the University of Alicante.

She has published over 150 articles in scientific journals and over 200 papers at both national and international conferences, and her areas of interest examine different aspects of Nephrology such as quality management, vascular access, illnesses of the mineral and bone metabolism, infection control, etc. She is the co-author of 5 chapters of books and the author of a book on vascular access in hemodialysis. She has been invited to speak at over 100 conferences both in Spain and in other countries.

She has been a member of the committee of experts charged with producing many clinical guides for the Spanish Nephrology Society and is a Member of the Committee of experts charged with writing the Manual of accreditation for hemodialysis units, proposed by the Valencian Health Service (7 April 2004), and of the Group of experts for drawing up standards and recommendations for the Hemodialysis Unit, under the Quality Agency of the National Healthcare System. Ministries of Health and social policy. Meeting of experts on 25 February 2010.

Member of the editorial committee of the nephrology journal and reviewer of articles in many scientific journals, both national and international (some highly prestigious such as Kidney Int, Nephron, NDT).

**ARRIBAS COBO, PATRICIA**

Infanta Leonor University Hospital, Madrid

Nephrology nurse since 1993. Nursing supervisor in the dialysis Unit since 2009.

General Secretary of the Spanish Society of Nephrology Nurses (SEDEN) 2001-2005. Vice- President of SEDEN since 2018.

Member of the teaching team of SEDEN from 2006 to 2018.
Various publications in the journal of Nephrology Nursing and papers presented at SEDEN conferences.

**DE SEQUERA ORTIZ, PATRICIA**

Infanta Leonor University Hospital, Madrid.

Head of the Nephrology Department, Infanta Leonor University Hospital.

Associate Professor of Medicine, Complutense University of Madrid.
Doctorate from the Autonomous University of Madrid. ‘Cum laude’ and special distinction.
Master in Health Management. EUROINNOVA Training Plan. Excellent.

Health Management Course, Antonio de Nebrija University.

Accredited by the National Quality and Accreditation Evaluation Agency (ANECA) to be able to participate in competitions for access to university teaching bodies.

**DEL PINO Y PINO, MARÍA DOLORES**

Torrecárdenas Hospital, Almería.

Doctorate in Medicine and Surgery, University of Granada, 1987. Nephrology specialty at Virgen de las Nieves University Hospital, Granada, Andalusia Health Service, 1991.

University Master in Health Management and Planning for Health Directives, 2015-2016, European University of Madrid.

University Expert in Hemodialysis and University Expert in therapeutic Apheresis, Complutense University, Madrid.

Master in atheroembolic illness and non-invasive diagnostic techniques, University of Lleida.

Head of Nephrology Service/Director of Nephrology and Dialysis Clinical Management Unit, Torrecárdenas University Hospital (until 2019), Almería.

Accreditation of professional skills at Excellent Level by the A.C.S.A

Member of the Royal Academy of Medicine (RAMAO).

Spanish Nephrology Society, Treasurer 2007-2014; President (2014-2017), re-elected President 2017-2020. Together with the Governing Body produced the First Strategic Plan for the S.E.N. 2017-2020.

Teaching, Publications and research: MD: University of Almería-University of Granada, teaching colleague on doctoral, post-doctoral and Master programmes; also on matters of arterial hypertension and of the kidney organized by the S.E.N. and AP, national kidney disease and nursing days. Director of doctoral theses and their preparation. Teaches on accredited courses on arterial hypertension, Dialysis and CKD, diabetic nephropathy. Lead tutor on the Postgraduate teaching of the Nephrology Service at C.H.T. 1993-2006; teaching tutor 2012-2014. Member of the PAIDI-investigación research group of the government of the Autonomous Community of Andalusia.

Joint Director of the Master in Therapeutic Apheresis, Complutense University in Madrid.

Joint Director of the Master in Hereditary Renal Illnesses, University of Alcalá.

Director of the Interventionist Nephrology Course. IAVANTE.

Active participant in teaching, research and public health activities on committees and working groups of the Andalusian Health Service, the Ministry of Health, other national and international scientific societies, associations and the kidney patients school.

**DÍAZ GÓMEZ, JUAN MANUEL**

Degree in Medicine and General Surgery (1986, University of Barcelona).

Specialist in Nephrology (1991, Fundació Puigvert).

Doctor in Medicine (2008, Autonomous University of Barcelona).

Full Professor of Medicine (2019, University of Vic-Central University of Catalonia).
Clinical and scientific career in two stages:

- Renal transplantation: Participation in 3 FIS Projects, 2 as lead researcher ("Alterations in the homeostasis of glucose after renal transplant: incidence, risk factors and consequences”, “Optimal immunosuppression in patients at high risk of new onset diabetes after renal transplant: a prospective, multi-focus, controlled and randomized study”) and 1 as co-investigator (“Pharmacogenetics of Tacrolimus (FK506) and cardiovascular risk in renal transplant”), Reading of Doctoral Thesis and many publications, invited to give oral presentations/posters at conferences/lectures on the clinical evolution of diabetes post-renal transplant, the prognostic value of blood pressure measured with MAPA in the first year post-renal transplant, the risk of diabetes mellitus post-renal transplant, the impact of various cardiovascular risk factors on the survival of the graft and of the patient and the predictive factors of the test for oral overload of pathological glucose.

- Dialysis: Participation in 1 Project FIS as co-investigator (“Biomarkers for prognosis and strategies to reduce the morbidity of patients with chronic kidney disease”). Various publications related to the morbidity of patients on hemodialysis and the effects of different strategies to reduce this (online HDF, dialyzers with vitamin D, administration of must [concentrated grape juice], etc.).

**GARCÍA MASET, RAFAEL**

Manises Hospital, Valencia. Head of Nephrology Service.

Associate Practical Teaching Professor (PAAP) Medical Degree. Faculty of Medicine and Dentistry. Catholic University of Valencia.

Teaching and Research Professor (PDI). Medical Degree. Faculty of Health Sciences. CEU Cardenal Herrera University.

**GONZÁLEZ PARRA, EMILIO**

Fundación Jiménez Díaz, Madrid

Associate Professor of Nephrology, Fundación Jiménez Díaz. Associate Professor of the Autonomous University of Madrid.

**HERNÁNDEZ MARRERO, DOMINGO**

Nephrology Clinical Management Unit at the Regional University Hospital in Málaga.

Full Professor of the University of Málaga. Director of the Nephrology Clinical Management Unit at the Regional University Hospitals of Málaga.

Full Professor at the Department of Internal Medicine and Dermatology of the University of Málaga. Now accredited as a university professor.

Coordinator of the Kidney Transplant Programme of the Renal Research Network (REDINREN).
Scientific Deputy Director of the Institute of Biomedical Research of Málaga (IBIMA).
President of the Spanish Transplant Society (SET).

Lead Researcher/Head of research groups:

REDINREN RD16/0009/0006

PAIDI CTS-663

“Nephrology and Renal Transplant” of the IBIMA

Evaluator of Research Projects in Health and Clinical Research at the Carlos III Institute of Health, and of the research projects at the Regional Ministry of Health of the Government of the Autonomous Region of Andalusia.

Supervision of 13 Doctoral Theses.

Lead researcher of 14 Projects of Competitive Research.
Over 250 scientific publications in indexed journals.
Co-editor of 5 Books and Author/Co-author of 43 Chapters of Books.
Member of the scientific committees of the Spanish Transplant Society (SET) and the Spanish Nephrology Society (S.E.N).

Reviewer of the following journals: Nephrol Dial Transplant, Am J Transplant, J Am Soc Nephrol, Kidney Int and Nefrología.

**HERRERO CALVO, JOSÉ ANTONIO**

San Carlos Clinical Hospital, Madrid.

Head of the Hemodialysis Unit and of ERCA (Advanced Chronic Renal Disease) at the Nephrology Service of the San Carlos Clinical Hospital in Madrid. Associate Professor of the Faculty of Medicine of Complutense University in Madrid. Co-Director of the following Degrees of the Complutense University of Madrid: "Master in Hemodialysis for Specialists in Nephrology", "Master in Therapeutic Apheresis" and "Master in Hemodialysis for Nursing Staff". Accredited as Full University Professor. Ex-President of the Madrid Society of Nephrology "SOMANE" and Coordinator of the "Strategic Nephrology Plan for the Community of Madrid".

**MADUELL CANALS, FRANCISCO**

Clinical Hospital, Barcelona.

Department Head in the Nephrology and Renal Transplant Service of the Clinical Hospital in Barcelona, Spain.

University training in Medicine at the University of Barcelona, then held the Nephrology Residence at the University Clinic of Navarra in Pamplona. Doctoral Thesis at the University of Navarra in 1990.

His scientific interest has principally focused on dialysis adequacy, dialysis dosage, treatment and prevention of complications of hemodialysis treatment, convective treatments, (OL-HDF, mid-dilution, mixed-dilution), filtration of uremic toxins, daily dialysis, nocturnal HDF-OL on alternate days and treatments with medium cut-off membranes (expanded hemodialysis). He has been the lead researcher on various multi-center studies, including the ESHOL study.

He has been an active member of the EuDial Working Group on Dialysis Therapy of the European Nephrology Society (ERA-EDTA). Member of the Spanish Nephrology Society (S.E.N.), coordinator of clinical guides to hemodialysis and has been coordinator of the register of patients on daily dialysis.

Frequently contributes to the Editorial Boards of various national and international journals.
Author or co-author of over 190 publications in journals, 17 chapters of books and over 500 papers/presentations at scientific meetings.

**MOLINA, PABLO**

Doctor Peset University Hospital. Nephrology Service, Department of Medicine, University of Valencia.

Nephrologist in charge of the Hemodialysis Unit at Doctor Peset University Hospital and associate professor of the Department of Medicine at the University of Valencia. His principal areas of interest are nutrition of the renal patient, alterations in the bone mineral metabolism associated with kidney disease and hemodialysis, including home hemodialysis. He is currently a member of the European Renal Nutrition (ERN) working group of the European Renal Association – European Dialysis and Transplantation Association (ERA-EDTA), and the working group on Home Hemodialysis of the Spanish Nephrology Society (S.E.N.). He contributes to clinical guides on hemodialysis and alterations in bone mineral metabolism by the S.E.N.. Since 2017 he has been a member of the editorial committee of Nephrology, Dialysis and Transplantation.

**MOLINA NUÑEZ, MANUEL**

Santa Lucía General University Hospital, Cartagena.

Head of the Nephrology Service since 2008, his professional and research activity has centered on renal anemia (Artificial intelligence for a clinical decision support system to optimize anemia management in hemodialysis patients: results from an international pilot study. Carlo Barbieri, Manuel Molina, Pedro Ponce, Monika Tothova, Isabella Cattinelli, Jasmine Ion Titapiccolo, Flavio Mari, Claudia Amato, Frank Leipold, Wolfgang Wehmeyer, Stefano Stuard, Andrea Stopper, Bernard Canaud. Kidney International (2016) 90, 422–429), the dialysis dose (Hemodialysis patients receiving a greater Kt dose than recommended have reduced mortality and hospitalization risk. Francisco Maduell, Rosa Ramos, Javier Varas, Alejandro Martin-Malo, Manuel Molina, Rafael Perez-Garcia, Daniele Marcelli, Francesc Moreso, Pedro Aljama and José Ignacio Merello. Kidney International (2016) 90, 1332–1341, and the dialysis bath (Citrate versus Acetate-Based dialysate in on-line hemodiafiltration. A prospective cross-over study. Manuel Molina, Rosa de Alarcón, Susana Roca, Gracia Alvarez, Maria Soledad Ros, Cristina Jimeno, Laura Bucalo, Isabel Villegas, María Ángeles García. Blood Purif 2015, 39: 181-187). Co-author of joint manuals with Primary Healthcare and the Guides to Hemodialysis of the Nephrology Society of Murcia.

**OTERO GONZÁLEZ, ALFONSO**

University Hospital Complex of Ourense.

Doctor in Medicine and Surgery USC (University of Santiago de Compostela) 2007 and Head of the Nephrology Service at the CH (University Hospital Complex) of Ourense since 1986. Technical Expert for ACEI (Spanish Agency for Certification and Innovation) and accredited by ESADE BUSINESS SCHOOL in “Management of clinical units” (Madrid 2002).

Clinical Tutor USC – CH University of Ourense (Nephrology) for the academic years: 1984-1985; 1990-1999, 2007-2008, to present date.

Supervisor of Doctoral Theses (3) and Dissertations (6) and holder of an award from the social security research fund (FISS) in 1989 and 1990, from the General Secretariat for Research in development of the government of the autonomous community of Galicia (PR425R 2002/60-0) (P08/58) 10CSA383009PR)” and holder of an award from the social security research fund (FISS) 2013-2017 and 2015-2017:
Member of RETIC (Cooperative Research Thematic Network) (RD code 16/0007) “Research network in preventive activities and health promotion”.

Colleague on the Technical Scientific Consultancy Unit (avalia-t) in “New and emerging Health Technologies” 2015. Member of the Board of the Biomedical Research Foundation of South Galicia, Spokesperson for the Board of Directors of the Spanish Nephrology Society and member of the Editorial Committee of the Journal “Nefrología” and Referee for BMC Nephrology. Publications (cvn: 2018227: 120 Publications, 25,888 Impact Points / 18 "h" index, 37,66 RG score and 341 Conference Papers.

**PASCUAL, JULIO**

Hospital del Mar, Barcelona.

Director of the Healthcare and Medical Area of the Consorci Mar Parc de Salut in Barcelona.

Head of the Nephrology Service and director of the Renal Transplant program at the same center. Degree in Medicine from Complutense University in Madrid (1986), specialist in Nephrology (1990), nephrologist at the Ramón y Cajal Hospital (1991-2009). 1992: Doctor in Medicine with Special Distinction. Fellowship in research and transplant at the University Wisconsin (2006-2007). From 2008-2009: Director of Medicine at the European University in Madrid, leading its accreditation and developing its new qualifications in Medicine.

He is currently associate professor at the Autonomous University of Barcelona and Coordinator of the Kidney Disease Research Group at the Medical Research Institute of the Hospital del Mar, where he has supervised or jointly supervised 12 theses, with another 9 ongoing. He is the teaching coordinator on the Medical-Surgical Pathology IV course of the UAB-UPF universities common degree. In 2017 he obtained accreditation for advanced research as university professor from AQU (Catalan University Quality Assurance Agency) and he has applied for accreditation as university professor from ANECA (National Agency for Quality Assessment and Accreditation), currently awaiting a decision.

Lead researcher on competitive research projects financed by public (ISCIII) and private institutions and on a large number of clinical trials from phases IB to IV. Guaranteed funding with the FIS ISCIII for the period 2020-2022 and with RETIC RedinRen RD16/0009/0013, 2016-2020.

Assessor in matters of kidney disease for the AQUAS Agency and Project evaluator for ANEP and for various European agencies.

Invited to speak at over 200 conferences in the most diverse national and international forums, and over 1000 Reports to Conferences. Author of over 140 articles or chapters of books and 340 works published in indexed journals (excluding letters to the editor), with over 11500 citations and an h-index of 50. From 2004 to 2012 he has been a member of the first Management Board of the Madrid Nephrology Society and from 2008 to 2014 of the Management Board of the Spanish Nephrology Society and of the Management Board of the Spanish Transplant Society. During the period 2012-2016 he has been a member of the Board of the European Transplant Group of the European Dialysis and Transplant Association. He is currently a member of the group Kidney Disease Improving Global Outcomes (KDIGO) which produces international guides to kidney transplantation.

He is Editor-in-Chief of the journal Transplantation Reviews, Editor of the Transplant Section of the Spanish Nephrology Journal and member of the Editorial Committee of various national and international scientific journals.

**PÉREZ-GARCIA, RAFAEL**

Infanta Leonor University Hospital, Madrid. Complutense University in Madrid.

Degree in Medicine and Surgery from Complutense University in Madrid (UCM) in 1974. Degree with special distinction from the Autonomous University of Madrid (UAM), 1978. Specialist in Internal Medicine from UCM, 1977. Specialist in Nephrology from UAM, 1978. Grade of Doctor “Cum Laude”. Doctoral Thesis "Renal Metabolism and Ammoniogenesis in Hypoxic Lactic Acidosis and its recovery in dogs". Directors: F. Valderrábano and L. Hernando. UAM, 1989. Associate Professor of Medicine, 1994 to 2018. Department of Medicine UCM. Associate doctor at Gregorio Marañón University General Hospital in Madrid from 1978 to 1985. Clinical Head of the Nephrology Service from 1985 to 2008. Senior Medical Consultant. Level V of the HGUGM (Gregorio Marañón University General Hospital) professional Career. Head of the Nephrology Unit of the Infanta Leonor University Hospital. Madrid, 2008 - 2018. Publication of articles in indexed scientific journals: 208; papers and presentations to Conferences: 567; chapters in medical books: 53. Member of various hospital tribunals and committees: Research (HGUGM and HUIL); infections (HGUGM). Evaluator of the FIS. Member of the Scientific Committee of ICOMEM. Coordinator of 24 Spanish and international multi-center works. Founder of the Spanish Glomerulonephritis Register (S.E.N.). Principal researcher and associate on 6 FIS projects. Secretary and Vice-President of the Spanish Nephrology Society (S.E.N). Vice-President of the SOMANE Madrid Nephrology Society. President of the Nephrology public employment offer tribunal of the Autonomous Community of Madrid 2010-2012. Co-Director and professor on three Master in Medicine courses at UCM. Nephrology Service of HUIL: TOP 20 2015.

**PEREIRA, MÓNICA**

Fundación Jiménez Díaz, Madrid

Graduate in Nursing. Expert in hemodialysis for nursing staff.
Supervisor of Nursing Services at the FRIAT- FJD Dialysis Unit.
Principal Tutor of Clinical Practices at UAM.

Teaches on the “University Expert in hemodialysis for Qualified Nursing Staff” course.
Evaluator of scientific work presented to SEDEN Conferences.
Various publications in nephrology journals.

**PRIETO, MARIO**

Doctor in Medicine at the University of Cantabria. Head of the Nephrology Unit at the University Hospital of León. Member-Coordinator of the ERCA (Advanced Chronic Renal Disease) group of the S.E.N. (Spanish Nephrology Society). Member-coordinator of the ACERCA project of the S.E.N..

**PULIDO PULIDO, JUAN FRANCISCO**

University qualification in Nursing from the Autonomous University of Madrid at the “Jiménez Díaz” University School in Madrid, 1991/1994.

Nurse in the Nephrology Service, working in every area (Hospitalization, Transplant, Outpatient Hemodialysis, Isolated and Acute patients, Peritoneal Dialysis and Therapeutic Apheresis) at the Gregorio Marañón University General Hospital in Madrid from October 1995 to February 2011.

Head of the Nursing Unit in the Nephrology Service of the Gregorio Marañón University General Hospital in Madrid from February 2011 to the present date.

President of the Spanish Society of Nephrology Nurses (SEDEN) since November 2018

Member of the Spanish Society of Nephrology Nurses (SEDEN) since 1995 to the present date with the registration number 3064.

Member of the teaching staff group in the Spanish Society of Nephrology Nurses (SEDEN) from 2002 to 2018.

Professor in the School of Health Sciences from 2004 to the present date.

Member of the National Editorial Council of the Journal Enfermería Nefrológica (Nephrology Nursing) of the Spanish Society of Nephrology Nurses from 2008 to the present date.

Nominated by Complutense University in Madrid on the motion of the University School of Nursing, Physiotherapy and Podiatry as “Practical Teaching Nursing Colleague” of the Department of Nursing.

Professor on the Master in Therapeutic Apheresis at Complutense University in Madrid.

Professor on the Master in Hemodialysis at Complutense University in Madrid.

Member of the working group “Nurses’ Working Group on Inflammatory Intestinal Disease” (GETEII).

Professor on the “Nephrology Nursing Specialty” course at Jaume I University in Castellón.

Author of various scientific works, in addition to articles and chapters of books, all relating to Nephrology.

Author of various papers for conferences, study days, seminars and symposia.

**SÁNCHEZ ÁLVAREZ, JOSÉ EMILIO**

University Hospital of Cabueñes, Gijón

Academic Qualifications: University of Oviedo. Degree in Medicine and Surgery (University of Oviedo). Doctor in Medicine (University of La Laguna).
Professional Experience: Current post: Head of the Nephrology Service, University Hospital of Cabueñes. Previous posts: Specialist Physician in the Area of Nephrology; Central University Hospital of Asturias (2007-2018). Specialist Physician in the Area of Nephrology; Hospital del Oriente de Asturias (2006-2007). Nephrologist at the Hospiten group (1997-2006)

Training: Master in Atherothrombotic disease and diagnosis by non-invasive techniques, Master Degree. University of Lérida (academic year 2013-2014). Cardio-renal Master program. Complutense University in Madrid (academic year 2011-2012). Bases of health planning and administration, Master Degree. National University of Distance Learning - U.N.E.D. (academic year 2004-2005).

Publications: Numerous publications in the field of peritoneal dialysis, the epidemiology of kidney disease and alterations in the bone and mineral metabolism.

**SÁNCHEZ HERNÁNDEZ, ROSA**

Villalba General Hospital, Madrid.

Specialist Physician in Nephrology via MIR at the 12 de Octubre Hospital (Madrid).
Head of the Nephrology Service at Villalba General Hospital in Madrid.
Specialist in Support and Palliative Care via a Master at the Autonomous University of Madrid.

Master in Ultrasound and interventionist Nephrology, University of Alcalá de Henares.
Ex Member – Coordinator of the selection committee of the Spanish Nephrology Society during 2 rounds of applications.

Organizer of Courses in Palliative Care at ERCA.
Organizer of Nephro-vascular courses.

Head of the palliative care group of the S.E.N.
Joint Head of the Nutrition Group of the S.E.N.

Co-editor of the Book “Cuidados paliativos renales (Renal palliative care)” at ERCA 1st edition 2018 S.E.N/SECPAL.

REVIEWERS:

**MARTÍN DE FRANCISCO HERNÁNDEZ, ÁNGEL**

University of Cantabria, Santander.

European Council member 1998-2002).

President of S.E.N. 2002-2008.

KDIGO Executive member 2010-2014.

Nephrology Service (Dialysis) Marqués de Valdecilla University Hospital in Santander (until 2017).

Onco-Nephrology group, S.E.N.

**MARTÍN MALO, ALEJANDRO**

Reina Sofía University Hospital, University of Córdoba.

Degree in Medicine from the University of Navarra 1976. Doctoral thesis “Cum Laude” at the University of Córdoba 1987. M.I.R. Nephrology at Puerta de Hierro Clinic 1980. Head of the Nephrology department of Reina Sofía University Hospital; and Professor of Medicine at the University of Córdoba. Lead researcher at IMIBIC. Six-year research periods recognized by the CNEAI: 6/6. Autonomous sections 5/5. h-index (factor h) 38 (wos); h-index 45 Google Scholar Citation. Periods spent in foreign centers, University of London (England), Saint Peter's Hospital 1985; Research Associate University of California Los Angeles (UCLA), USA. Publications 191, Chapters of books/Articles 85. Papers for Conferences 519, Invitations to give Lectures 159. Conferences as chairman/moderator 67. Research prizes 25. Research projects subsidized by public/private institutions 39, lead researcher in 20 of these. Member of the Committee of European Best Practice Guidelines for Hemodialysis. Basic Guides to Mineral Metabolism in Kidney Disease. Member of various Steering Committees. Evaluator of multi-nationals related to the health sector. Reviewer of many indexed journals, International scientific Conferences and evaluation agencies.

**DÍAZ-TEJEIRO IZQUIERDO, RAFAEL**

University of Toledo Hospital Complex.

Degree in Medicine and Surgery from Complutense University in Madrid in 1981. Degree of doctor from the University of Navarra with “Cum-Laude” mention in 1989. Specialized in Nephrology via MIR at the University Clinic of Navarra between 1985 and 1989.

Associate physician at the Virgen de la Salud Hospital in Toledo from 1989 to 2018 and from January 2019 to the present date he has exercised his profession as Head of the Nephrology Service at the same hospital.

Degree as Expert in Hemodialysis awarded by the Faculty of Medicine at Complutense University in Madrid (2005), University Master in Atherothrombotic disease and diagnosis by non-invasive techniques awarded by the University of Lleida (2012-2013), and University Master in Diagnostic and Interventionist Nephrology awarded by the University of Alcalá de Henares (2015).

Professor on the Expert Master in Hemodialysis in the area of controversies in vascular access from 2009 to the present date. He has led numerous workshops and courses on the use of ultrasound in vascular access. Professor at the Ultrasound workshop: A nursing tool in managing vascular access, at the SEDEN Conference, Toledo 2014 and at the Eco Doppler workshop on vascular access in the “Carlos Caramelo” course to update dialysis adequacy, Fundación Jiménez Díaz, Madrid 2010 and 2011. Professor at the 1st Study Day on chronic kidney disease on Doppler ultrasound for Nephrologists: Planning, implementing and monitoring vascular access. Alcázar de San Juan 2011. Currently joint organizer and professor on the practical theory course for the use of Ultrasound in the hemodialysis Unit between the years 2016 and 2019. Has presented over 80 papers at national and international conferences and has over 30 publications and chapters of books in national and international journals.

**FERNÁNDEZ LUCAS, MILAGROS**

Ramón y Cajal University Hospital, Madrid.

Head of Nephrology Service, Ramón y Cajal University Hospital, Madrid. Associate Professor, University of Alcalá.

Expert in Hemodialysis techniques and multidisciplinary management of Chronic Kidney Disease.

**GUTIÉRREZ MARTÍNEZ, EDUARDO**

12 de Octubre University Hospital, Madrid.

Current appointments: 12 de Octubre Hospital. Department of Nephrology. Complutense University, Madrid, Spain.

Qualifications: Staff Division of Nephrology, 12 de Octubre Hospital. Associate Professor of Medicine, Complutense University, Madrid. M.D.

• Staff Division of Nephrology, 12 de Octubre Hospital (2004 – present date). Staff Division of Nephrology, Virgen de la Salud Hospital and “Nuestra Señora del Rosario” Hemodialysis Unit (2003-2004).

Associate Professor of Medicine, Complutense University, Madrid. (2009-2011)

• Carlos III Institute, Fondo Investigaciones Sanitarias (Health Research Fund), Spanish Ministry of Health. Clinicopathologic correlations in IgA nephropathy. Years 2013-2014. Value 50,000 Euros. Lead Researcher. Extended.

• Carlos III Institute, Fondo Investigaciones Sanitarias (Health Research Fund), Spanish Ministry of Health. Clinicopathologic correlations in IgA nephropathy. Years 2010-2012. Value 50,000 Euros. Lead Researcher.

• Grants for Independent Clinical Investigation, Spanish Ministry of Health. Antiproteinuric effect of diuretics, a prospective clinical study. Years: 2010-2013. Value 75,000 Euros. Collaborator Researcher

H-Index: 19 (Web of Science). Indexed publications: 142.

**MUÑOZ GONZÁLEZ, ROSA INÉS**

University Hospital of Basurto, Bilbao.

Degree in Medicine and Surgery from the Faculty of Medicine at the University of Salamanca in 1985. Doctoral studies at the University of the Basque Country 1992-94. Degree of specialist nephrology doctor from Cruces Vizcaya University Hospital, from March 1989 to December 1992.

MIR for nephrology at the Hospital de Cruces (1989-1992). Specialist nephrology physician at Taxgorritu, Cruces and Basurto Hospitals (1993-2001).

Specialist nephrology physician at Galdakao Hospital (2001-2018). Hemodialysis Unit with a place as a permanent member of staff at Osakidetza.

Specialist nephrology physician at the University Hospital of Basurto (2018 – present date) with a place as a permanent member of staff at Osakidetza.

Member of the Corporate Pharmacy Committee at Osakidetza – Basque Health Service. From 31 May 2018 to February 2019.

President of the Northern Nephrology Society, from November 2010 to November 2014. Elected to the post by the nephrologists of 4 autonomous regions.
Tutor of residents in Nephrology at Galdakao Hospital (2008-2018) with double official accreditation from the Department of Health of the Basque Government. Professor on the Master in Hemodialysis at Complutense University in Madrid, for the academic years 2010-11, 2011-12, 2012-13, 2013-14, 2014-2015, 2015-2016, 2016-2017, 2017-2018, 2018-2019, 2019-2020.
Publications in journals: Hemodialysis International, Nephrol Dial Traspl, DPI, Nefrología. Chapter of book: Technical problems in patients on hemodialysis. ISBN978-953-307-403-0. 2011.

Over 40 papers at national conferences and over 10 at international conferences. Articles on chronic kidney disease and talks at scientific meetings: S.E.N, SEDYT, SNN.
Member of the National Editorial Committee of the journal Diálisis y Trasplante since 2009.

**OJEDA LÓPEZ, RAQUEL**

Reina Sofía University Hospital in Córdoba.

Nephrologist dedicated to all aspects of Dialysis but principally Hemodialysis, although also peritoneal dialysis, a consultant in terminal Chronic Kidney Disease, and dialysis of acute patients. Examples of this are the works/publications where she has led and/or those in which she has participated.

1. Period of MIR in nephrology: *Reina Sofía University Hospital in Córdoba: July 2001 - July 2005

2. Healthcare experience: 2.1.*Specialist physician in the area of nephrology (1/11/2005 to 1/1/2013) at Reina Sofía University Hospital in Córdoba. 2.2. Nephrologist – Specialist in dialysis (14/01/13 to 30/04/2018) at the Nephrology and Renal Transplant Service at the Hospital Clínic i Provincial in Barcelona.

*Specialist physician in the area of nephrology (1/05/2018 to the current date) at Reina Sofía University Hospital in Córdoba. 3. Scientific articles. 3.1. Xipell M, Montagud-Marrahi E, Rubio MV, Ojeda R, Arias-Guillén M, Fontseré N, Rodas L, Vera M, Broseta, JJ, Torregrosa V, Filella X, Maduell F. Improved Control of Secondary Hyperparathyroidism in Hemodialysis Patients Switching from Oral Cinacalcet to Intravenous Etelcalcetide, Especially in Nonadherent Patients. -Blood Purif. 2019 Jan 30:1-9.//2. Salcedo C, Joubert PH, Ferrer MD, Canals AZ, Maduell F, Torregrosa V, Campistol JM, Ojeda R, Perelló J. A phase 1b randomized, placebo-controlled clinical trial with SNF472 in hemodialysis patients. Br J Clin Pharmacol. 2019 Apr; 85(4):796-806.

**RODRÍGUEZ BENÍTEZ, PATROCINIO**

Gregorio Marañón University General Hospital, Madrid.

Specialist in Nephrology and in Family and Community Medicine.
Concerning my teaching duties, I am a professor colleague working with fifth year Medical students at Complutense University in Madrid, in the area of Nephrology and I take an active part in the practical teaching of the residents, both in Nephrology and in other specialties, from 2005 to the present date. I participate as professor in three Master Courses at Complutense University: Master in Hemodialysis for specialists in Nephrology, Master in Hemodialysis for Nursing Staff and Master in Therapeutic Apheresis. Also, when it was running, on the Cardio-renal Master. In recent years I have been invited to speak at various National Conferences of the Spanish Nephrology Society and at meetings of the Madrid Nephrology Society, as well as at other courses and meetings on ARF and on managing septic and critical patients by renal replacement therapy.

As a clinical researcher, I have contributed to 42 articles in national journals, 18 articles in international journals, and 28 abstracts published in national journals. I have made 120 presentations to conferences at national level and 12 to international conferences. I have participated in over 30 lectures, round tables and discussions and written 26 chapters in books related to the field of Nephrology.

I have participated in 8 research projects, all related to ARF. In two of them I was lead researcher.

**SÁENZ SANTOLAYA, ALFREDO JOSÉ**

Infanta Leonor University Hospital, Madrid

Nursing Qualification from the University of Valladolid, Soria Campus.
Deputy Director of Nursing in charge of the outpatient facility at Avd. Aragón, Madrid
Head of Nursing, Primary Care Team, CS Avd. Aragón.
Co-author of the “Guide to the Prevention and Management of Skin Ulcers” Area 4 AP, Madrid. University Expert in Hemodialysis for DUE, Complutense University, Academic year 2008-2009. Teacher on the “Master in Hemodialysis for Nursing Staff” Complutense University, Academic years 2015-2020. Clinical Practice Tutor for undergraduate students of Nebrija, Europea and Complutense Universities. Clinical Practice Tutor for students on the “Master in Hemodialysis for Nursing Staff” at Complutense University.

Co-author of the Covidien Quinton Prize essay 2010 on Indwelling Catheters. Author of the work awarded second prize in the Janssen Prize for research in Nephrology Nursing 2012. Co-author of the work awarded Second Poster Prize by Fresenius Medical Care in 2014. Co-author of various Presentations and Posters presented at SEDEN conferences. Co-author of various articles published in the SEDEN journal.
Teacher on the course “Integrated care for the patient with Chronic Kidney Disease” organized by AP Care Management in the years 2015 and 2016.

**SLON ROBLERO, MARÍA FERNANDA**

Hospital Complex of Navarra, Pamplona.

Nephrology Specialty at the Department of Nephrology at the University Clinic of Navarra.
Associate physician of the Nephrology Service of the Hospital Complex of Navarra from May 2010 to the present date.

Head of the Home Dialysis Unit of the Nephrology Service at the Hospital Complex of Navarra.

Participant in the KDIGO Controversies Conference on Dialysis Initiation, Modality Choice and Prescription (Madrid, January 2018).

Member of the Scientific Committee of the REER (Spanish Register of Kidney Patients) since July 2019.

Head of the REER Register and the ERA-EDTA Register of kidney patients in Navarra.
Spokesperson for the S.E.N. working group: "Support for and promotion of home hemodialysis in Spain".

Co- researcher in the area of cardiovascular and renal disease at the Instituto Navarro para la Investigación de la Salud (Navarra Institute of Health Research) (IDISNA).

Associate Clinical Professor of the Faculty of Medicine at the University of Navarra.

**TORNERO MOLINA, FERNANDO**

Southeast University Hospital, Arganda del Rey.

Head of the Nephrology Department of Southeast University Hospital. Formerly expert specialist and latterly Head of the Nephrology Department at the Virgen de la Luz Hospital in Cuenca and expert specialist at San Carlos Clinical Hospital. MIR specialist at San Carlos Clinical Hospital. Associate professor of Medicine at the European University of Madrid and at Complutense University in Madrid and teaching colleague in practical work at Francisco de Vitoria University and teaching colleague in practical work in biomedical engineering at the Rey Juan Carlos University. Professor on the Master in "Expert hemodialysis for Nephrology specialists", "Cardio-renal syndrome" and “Integrated care for the patient with advanced chronic disease and palliative needs”. Professor on the Toledo Dialysis course for Residents in Nephrology. Director and Professor on the Training course in Peritoneal Dialysis for Residents in Nephrology. President and founding Member of the Castilla-La Mancha Nephrology Society, Treasurer and, more recently, President of the Madrid Nephrology Society. Coordinator of the working group on Geriatric Nephrology of the Spanish Nephrology Society. Author of 40 publications, 28 chapters of books, 180 lectures at Conferences, 120 papers at Scientific Conferences.

Annex 2. DECLARATION OF CONFLICTS OF INTEREST

Dr. Guillermo Alcalde Bezhold declares no conflict of interest.

Dr. Roberto Alcázar Arroyo declare some economical compensation from Fundación Renal Íñigo Álvarez de Toledo for Advisory tasks, not related to this work.

Dr. Manuel Angoso de Guzmán declares no conflict of interest.

Dr. Marta Arias Guillén declares no conflict of interest.

Dr. María Dolores Arenas Jimenez declares no conflict of interest.

Dr. Patricia Arribas Cobo, declares no conflict of interest.

Dr. Patricia de Sequera declares no conflict of interest.

Dr. María Dolores Del Pino Pino declares no conflict of interest.

Dr. Juan Manuel Díaz declares no conflict of interest.

Dr. Rafael García Maset declares no conflict of interest.

Dr. Emilio González Parra declares no conflict of interest.

Dr. Domingo Hernández Marrero declares no conflict of interest.

Dr. José Antonio Herrero Calvo declares no conflict of interest.

Dr. Francisco Maduell declares no conflict of interest.

Dr. Pablo Molina declares some compensation from Palex and Medtronic for Consultory tasks.

Dr. Manuel Molina Núñez declares no conflict of interest.

Dr. Alfonso Otero González declares no conflict of interest.

Dr. Julio Pascual Santos declares no conflict of interest.

Dr. Rafael Pérez García declares no conflict of interest.

Dr. Mónica Pereira García declares no conflict of interest.

Dr. Mario Prieto-Velasco declares no conflict of interest.

Dr Juan Francisco Pulido Pulido declares no conflict of interest.

Dr. José Emilio Sánchez Álvarez declares no conflict of interest.

Dr. Rosa Sánchez Hernández declares no conflict of interest.

Annex 3. REQUEST FOR TEMPORARY DIALYSIS CARE

| REQUEST FOR TEMPORARY DIALYSIS CARE  Date:  INFORMATION ON THE PATIENT   - Full name - Social security number or other type of coverage - Contact phone/s (personal and family) - Fax and/or e-mail   INFORMATION ON THE CENTER OF ORIGIN   - Dialysis center or hospital of origin (contact phone, fax or e-mail) - Isolation of patients with HCV by rooms or shifts   APPLICATION:   - Period for which dialysis care is requested - Reasons for transfer / displacement - Mailing address and telephone contact during stay - Usual dialysis shift - Need for care transport and type     MEDICAL INFORMATION OF INTEREST   - Allergies. - Included / excluded from transplantation waiting list and reference transplantation center. - Type of vascular access. - Other potentially contagious infections. - Special conditions: increase / decrease in the number of weekly dialysis sessions over 3, increase in dialysis time over 4 hours, need for bed, special clinical difficulties, recent stay in acute cases center, or recent transfusion. - Serology report: the tests may be no longer then 3 months old (the aim is to determine the conditions of the patient not only to identify potentially infectious individuals, but also to know whom to protect if the patient comes on holiday to our HD unit).   Mark (X) the applicable shaded zone and accompany by Microbiology sheet.   | 1 | HIV Ab | Positive |  | Viral load + | | |  | | | --- | --- | --- | --- | --- | --- | --- | --- | --- | | Viral load - | | |  | | | Negative |  |  | | | | | |  |  | | | | | | | | | 2 | HBsAg | Negative |  | HBsAb + | | HBcAb + | |  | | HBcAb - | |  | | Positive |  |  | | | | | |  |  | | | | | | | | | 3 | HCV Ab | Negative |  |  | | | | | | Positive |  | RNA + |  |  | | | | RNA negative | | Treated with sustained viral response > 6 months non-infective for treated genotype | |  | | Spontaneous RNA loss | |  |   Only the patients in boldface (HBsAg positive) require isolation in a specific room. The rest ONLY must STRICTLY observe the universal measures of caution AT ALL TIMES.  Established by consensus in virus group (May 2018)  Mr.................................................. Dr..............................................................  Signed in.............., on........ of........... of.............. |
| --- | --- | --- | --- | --- | --- | --- | --- | --- | --- | --- | --- | --- | --- | --- | --- | --- | --- | --- | --- | --- | --- | --- | --- | --- | --- | --- | --- | --- | --- | --- | --- | --- | --- | --- | --- | --- | --- | --- | --- | --- | --- | --- | --- | --- | --- | --- | --- | --- | --- | --- | --- | --- | --- | --- | --- | --- | --- | --- | --- | --- | --- | --- | --- | --- | --- | --- | --- | --- | --- | --- | --- | --- | --- | --- | --- | --- | --- | --- | --- | --- | --- | --- |

Annex 4. MEDICAL CLINICAL REPORT

| MEDICAL CLINICAL REPORT  The clinical report should be detailed, with a description of the following aspects:  1. FAMILY HISTORY  2. PERSONAL HISTORY:   - Allergies - Toxic habits (smoking, alcohol, other drugs) - Evaluation of cardiovascular risk (AHT, DM, toxic habits, dyslipidemia, etc.) - Surgical history, hospital admissions, diseases at different levels: pneumological, gastrointestinal, cardiological, vascular, etc.) - Complete viral serology and vaccination status   It is advisable to provide information on occupational status, educational level and family support.  3. NEPHROLOGICAL-UROLOGICAL HISTORY: A description of the renal disease leading to dialysis is required, as well as of the evolution and the duration of follow-up by the nephrologist.  4. PHYSICAL EXAMINATION: Must be recent (no more than three months).  Completion is required of each of the following sections, which define the updated situation of the patient, as well as his or her disease at these levels:   - VASCULAR ACCESS: Describe the vascular accesses of the patient, their date of creation, the central venous catheters used, and their derived complications. - HEMATOLOGICAL SITUATION and BLOOD TRANSFUSIONS - CARDIOVASCULAR SITUATION - GASTROINTESTINAL SITUATION, placing special emphasis on viral serology. - PNEUMOLOGICAL SITUATION - NEUROLOGICAL SITUATION - INFECTIOUS COMPLICATIONS - RENAL OSTEODYSTROPHY - SITUATION WITH REGARD TO RENAL TRANSPLANTATION WAITING LIST - COMPLEMENTARY TESTS - LATEST LABORATORY TESTS - LATEST VIRAL SEROLOGY (specify the date; no more than 3 months old)   5. UPDATED HEMODIALYSIS REGIMEN (Can be omitted if already included in the attached nursing report).  The following should be included: duration of the sessions; shift and days (frequency); type of technique (HD, HDF, HDF-OL); dialyzer (brand, model, membrane, surface, sterilization method); blood flow; characteristics of the dialysis fluid (DF), conductivity and temperature of the DF; DF flow; type of current vascular access and form of use; anticoagulation; dry weight; usual tolerance of the technique; pre- and post-dialysis blood pressure. Other relevant information referred to dialysis.  6. TREATMENT: INTRA-DIALYSIS AND GENERAL  7. CURRENT SITUACION: A brief summary should be provided of the most important current problems of the patient that may imply incidents during his or her stay in the destination center.  Dr. .............................................................  Signed in.............., on........ of........... of.............. |
| --- |

Annex 5. NURSING REPORT

| NURSING REPORT  Mr./Ms. ...................................................................................................  History no. ................................. Social security no. .......................................  Date........................................ Hospital of origin.....................................  Serology: Allergies:  Contact phone: Family phone: Family situation: educational level – reading / writing  On renal transplantation waiting list:  Emotional situation in relation to HD session:  Level of dependency:  Recommendations:  Dialysis technique:  Weekly dialyses: Usual days: Dialysis time:  Dialyzer: Dialysis fluid: Bath flow:  Anticoagulation:  Pre-dialysis weight: Intra-dialysis weight gain:  Residual renal function:  Maximum tolerated ultrafiltration (ml/h):  Nutritional status:  Dietetic care:  Intra-dialysis intake:  Recommendations:  Intra-dialysis medications, special precautions:  Vascular access:  Type...............................................................................................................................  • Usual needle caliber:  • Special cares.  • Self-care:  • Anticoagulant sealing (in case of permanent catheter).  • Usual extraction blood flow:  • Venous pressure with that flow:  • Most common problems: Problems referred to hemostasis; material and time for hemostasis; local anesthetics.  Diagnoses:  Other nursing cares:  Telephone and name of reference nurse:  With regard to medication, it would be appropriate for the patient to carry the erythropoiesis stimulating medication and intravenous iron for the whole travel period, except for incidents.  Nurse:.............................................................  Signed in.............., on........ of........... of.............. |
| --- |

Annex 6. DISPLACED PATIENTS ACCEPTANCE / REJECTION DOCUMENT

| DISPLACED PATIENTS ACCEPTANCE / REJECTION DOCUMENT  To be adapted to the specific requirements of each Community regarding the administrative documentation to be supplied and transport.  Date:  To:  Addressed to:  Dialysis Center of origin  Mail / FAX  From:  Mr./Ms.: physician, nurse or administration  Destination Dialysis Center  Mail / FAX / contact phone  CONFIRMATION  We confirm the dialysis station for the patient: ………………..........................…….. from the day ……...... to day.……… (both included) at the dialysis center……………….. (indicate center and address).  The assigned shift is:………………………………………/ We are unable at this time to assign a concrete shift. Please get in touch with us sooner to your travelling dates.  To report to the center at…………….. hours; ask for..........................………................ in …………….. (location of the Unit)  Authorization from the reference hospital or insurance company is to be submitted about 10 days in advance.  Upon your arrival, please provide a recent complete medical and nursing report, including the dialysis regimen, medical treatment, recent viral serological test results and ordinary laboratory tests (see recommendations of the Dialysis Centers Guide of the S.E.N.).  The patient should personally bring any medication of hospital use (erythropoietin, calcitriol, etelcalcitide, etc.) and the authorization of dialysis from the Social Security or reference center, clearly indicating the starting and ending date of dialysis care in our center.  We are unable to provide patient transport at this time; you will be duly informed if transport becomes available.  Regards,  REJECTION  At this time, we unfortunately are unable to confirm your dialysis station in our center, due to a lack of availability on the dates you have requested.  We regret the inconveniences this may cause.  If you wish, you may contact us again on other dates.  Regards  Mr. .................................................. Dr. .............................................................  Signed in.............., on........ of........... of.............. |
| --- |

Annex 7. GLOBAL INDICATORS

|  | Formula | Frequency | Standard |
| --- | --- | --- | --- |
| HD prevalence in period | Sum of prevalent patients on 31 December in the study period + withdrawals from HD  NOTE: Withdrawals from HD = (deaths + transplanted + transfers + recovery of renal function) | Annually |  |
| Crude mortality rate | Numerator: 100 × no. of deaths during the study period  Denominator: HD prevalence in period | Annually |  |
| Median modified Charlson index score | Calculated during the first month of treatment, corresponding to all the incident patients | Annually |  |

**ANEMIA**

| Percentage of patients with target hemoglobin | Numerator: no. patients of the Denominator with mean Hb > 11.0 g/dL < 12.0 g/dL during the study period  Denominator: no. patients on HD (during at least 4 months), prevalent in the study period | Monthly | To be defined |
| --- | --- | --- | --- |
| Percentage of patients with ferritin in optimum range 100‑500 µg/L) | Numerator: 100 × no. of patients with ferritin (mean value if more than one value) between 100‑500 µg/L in the study period  Denominator: no. of prevalent patients in the study period | Monthly | > 80% |
| Percentage of patients with Hb < 11 g/dL without ESA | Numerator: 100 × no. of patients with Hb < 11 g/dL in the study period  Denominator: no. of prevalent patients in the study period | Monthly | To be defined |
| Percentage of patients with Hb > 13 g/dL without ESA | Numerator: 100 × no. of patients with Hb > 13 g/dL in the study period  Denominator: no. of prevalent patients in the study period | Monthly | To be defined |

**ADEQUATE DIALYSIS**

| Percentage of prevalent patients with target Kt/V with HD for over 91 days and dialyzed 3 times a week Daugirdas II | Numerator: 100 × no. of  patients of the Denominator with mean*spKt/V of period > 1.4 (eKt/V 1.2)  Denominator: no. prevalent patients of period with HD for over 3 months and dialyzed 3 times a week | Two-monthly | > 88% |
| --- | --- | --- | --- |
| Percentage of prevalent patients with minimum KT | Numerator: 100 × no. of  patients of the Denominator with minimum Kt  Denominator: no. prevalent patients of period with HD for over 3 months and dialyzed 3 times a week | Monthly | > 88% |
| Percentage of prevalent patients on HDF-OL with recommended substitution volume | Numerator: 100 × no. of patients with substitution volume ≥ 21 liters  Denominator: no. prevalent patients of period with HDF-OL for over 3 months and dialyzed 3 times a week | Monthly | > 88% |

**BONE AND MINERAL METABOLISM**

| Percentage of patients with PTH 150-500 pg/mL | Numerator: 100 × no. of total patients in the Denominator with PTH 150 -500 pg/mL  Denominator: no. prevalent patients of the period | Three-monthly | > 30% |
| --- | --- | --- | --- |
| Percentage of patients with serum phosphorus < 5.5 mg/dL | Numerator: 100 × no. of  patients with four-monthly mean of all determinations of phosphorus < 5.5 mg/dL  Denominator: no. of  prevalent patients in that period | Two-monthly | > 50% |

**PURIFIED WATER**

| Conductivity of the treated water | Numerator: 100 × no. of determinations of the Denominator with values < 5 µS  Denominator: total no. of conductivity determinations of treated water in the study period | Monthly | > 80% |
| --- | --- | --- | --- |
| Percentage cultures of treated water with bacterial growth below range | Numerator: 100 × no. of treated water cultures with bacterial growth < 50 CFU/ 100 ml  Denominator: no. of treated water cultures in the study period | Monthly | 100% |
| Levels of aluminum in treated water | Numerator: 100 × no. of determinations of aluminum of treated water < 5 µg/L.  Denominator: no. of determinations of aluminum in treated water in the study period | Six-monthly | 100% |
| Levels of endotoxins in osmotized water (LAL) | Numerator: 100 × no. of LAL tests with values < 0.25 EU/mL  Denominator: total no. of LAL tests during the period | Monthly | 100% |

**ULTRAPURE WATER**

| Conductivity of the treated water | Numerator: 100 × no. of  determinations of the Denominator with values < 5 µS  Denominator: total no. of conductivity determinations of treated water in the study period | Monthly | > 80% |
| --- | --- | --- | --- |
| Percentage cultures of treated water with bacterial growth below range  ISO 1163: 2009 | Numerator: 100 × no. of  treated water cultures  with bacterial growth < 10 CFU/100 ml  Denominator: no. of treated water cultures in the study period | Monthly | 100% |
| Levels of aluminum in treated water | Numerator: 100 × no. of  determinations of aluminum in treated water < 5 µg/L.  Denominator: no. of  determinations of aluminum in treated water in the study period | Six-monthly | 100% |
| Levels of endotoxins in osmotized water (LAL)  ISO 1163: 2009 | Numerator 100 × no. of  LAL tests with values < 0.03 EU/mL  Denominator total no. of LAL tests during the period | Monthly | 100% |

**ULTRAPURE DIALYSIS FLUID**

| Percentage cultures of ultrapure dialysis fluid < 0.01 CFU/mL | Numerator: 100 × no. of  treated water cultures  with bacterial growth < 0.01 CFU/mL  Denominator: no. of treated water cultures in the study period | Monthly | 100% |
| --- | --- | --- | --- |
| Levels of endotoxins in ultrapure dialysis fluid (LAL) | Numerator 100 × no. of  LAL tests with values < 0.03 EU/mL  Denominator: total no. of LAL tests during the period | Monthly | 100% |

**VASCULAR ACCESS**

| Percentage of patients with graphic recording of puncture sites during the hemodialysis sessions | Numerator: no. of patients on HD in which puncture sites are recorded × 100.  Denominator: total patients on HD in which AVF is punctured | | Three-monthly | 100% |
| --- | --- | --- | --- | --- |
| Percentage of incident patients with usable vascular access | Numerator: 100 × no. of patients with usable autologous or prosthetic arteriovenous fistula (AVF)  Denominator: no. of incident patients in the study period | | Annually | >75% |
| Percentage of incident patients with central venous catheter (CVC), without contraindications for creation of arteriovenous fistula, in which the fistula was created within 6 weeks from placement of the catheter | Numerator: no. of incident patients without contraindications for AVF who start HD through CVC and with creation of AVF within 6 weeks × 100  Denominator: no. of incident patients without contraindications for AVF who start HD through CVC | | Monthly | >90% |
| Percentage of prevalent patients with more than 3 months in hemodialysis program, who on 31 December of the studied year were dialyzed through native arteriovenous fistula (nAVF) | Numerator: no. of patients on HD being dialyzed through functioning nAVF on 31 December of the studied year × 100  Denominator: no. of patients with more than 3 months in the HD program on 31 December of the current year | | Annually | >75% |
| Percentage of prevalent patients with more than 3 months in hemodialysis program, who on 31 December of the studied year were dialyzed through tunneled central venous catheter (CVC) | Numerator: no. of patients on HD being dialyzed through tunneled CVC (TVC) on 31 December of the studied year × 100  Denominator: no. of patients with more than 3 months in the HD program on 31 December of the current year | | Annually | < 20% |
| Annual thrombosis rate of native arteriovenous fistulas | Numerator: no. of thromboses of the nAVF in the study year.  Denominator: total number of patients/year at risk with nAVF in the study year. | | annually. | < 0.15 thromboses/patient/year |
| Annual thrombosis rate of prosthetic arteriovenous fistulas | Numerator: no. of thromboses of the pAVF in the study year.  Denominator: total number of patients/year at risk with pAVF in the study year.  Units: rate. | | annually. | < 0.50 thromboses/patient/year. |
| Percentage of endovascularly repaired thrombotic native arteriovenous fistulas (nAVF) that remain patent at 6 months | | Numerator: no. of patients with nAVF that remains patent after endovascular rescue due to thrombosis at 6 months  Denominator: no. of patients with nAVF rescued from thrombosis with interventional radiology techniques and who have been subjected to 6 months of follow-up | Annually | >50%  At 6 months |
| Percentage of surgically repaired thrombotic native arteriovenous fistulas (nAVF) that remain patent at one year | | Numerator: no. of patients with nAVF that remains patent after surgical rescue due to thrombosis at one year of follow-up × 100  Denominator: no. of patients with nAVF rescued from thrombosis with surgery and who have been subjected to one year of follow-up | Annually | >50% |

**VIRAL DISEASES**

| HCV seroconversion rate | Numerator: 100 × no. of  patients with positive HCV conversion in the studied period (HCV Ab positive and/or PCR positive)  Denominator: no. of  patients at risk (with HCV Ab and/or HCV-PCR negative dialyzed in the unit) | Annually | 0% |
| --- | --- | --- | --- |

**RENAL TRANSPLANTATION**

| Percentage of patients referred for evaluation to the Transplantation Center | Numerator: 100 × no. of patients on waiting list that have been referred to the Transplantation Center within less than 6 months after start of periodic hemodialysis  Denominator: total no. of patients except those with contraindications for transplantation or who reject inclusion on waiting list | Annually | To be defined |
| --- | --- | --- | --- |
| Percentage of patients on waiting list that have been transplanted | Numerator: 100 × no. of patients transplanted  Denominator: no. of patients on waiting list | Annually | To be defined |

Annex 8. MODIFIED CHARLSON INDEX

| Disease | Score |
| --- | --- |
| Coronary disease | 1 |
| Congestive heart failure | 1 |
| Peripheral vascular disease | 1 |
| Cerebrovascular disease | 1 |
| Dementia | 1 |
| Chronic pulmonary disease | 1 |
| Connective tissue disease | 1 |
| Peptic ulcer | 1 |
| Mild liver disease | 1 |
| Diabetes | 1 |
| Hemiplegia | 2 |
| Moderate-severe kidney disease | 2 |
| Diabetes with target organ damage | 2 |
| Any tumor, leukemia, lymphoma | 2 |
| Moderate-severe liver disease | 3 |
| Metastatic solid tumor | 6 |
| AIDS | 6 |
| In addition, for each decade of age > 40 years, | add 1 point more. |

In patients on dialysis

Non-diabetic patients will have a minimum score of 2 (corresponding to their kidney disease).

Diabetic kidney disease has a score of 4 (2 corresponding to diabetes with target organ involvement, and 2 corresponding to the kidney disease).

Chronic renal failure of other origin and diabetes without target organ damage has a score of 3 (1 corresponding to diabetes and 2 to the kidney disease).

The study published by Bedhu(579) proposes the division of comorbidity into four groups: low (< 4), medium (4 and 5), high (6 and 7) and very high (> 7), associated to significant increases in the number of admissions and days of stay, hospital costs, and annual mortality rates. Patients with a Charlson index score > 7 presented a mortality rate per patient and year of 0.47, i.e., close to one-half of the patients.

*A description is provided below of each of the items as they appear in the appendix of the original article(540), with the modification proposed by Bedhu(579).*

Coronary disease: patients with chest pain, myocardial infarction, angiographic evidence of coronary disease, a history of angioplasty and/or bypass surgery.

Congestive heart failure: patients who have suffered exertional dyspnea or nocturnal paroxysmal dyspnea, and have shown symptoms response (or in the physical examination) to treatment with digitalis, diuretics or after-load reducing drugs. This does not include patients who are taking these medications but have not experienced symptoms improvement, and in which there is no evidence of improvement of the physical signs.

Peripheral vascular disease: patients with intermittent claudication or bypass due to arterial insufficiency; amputation, gangrene or acute arterial insufficiency; thoracic or abdominal aneurysms (6 cm or more) not subjected to surgery.

Cerebrovascular disease: patients with a history of cerebrovascular events (with minor sequelae or no sequelae) and of transient ischemic attack.

Dementia: patients with chronic cognitive impairment.

Chronic lung disease: patients with dyspnea, attributable to their lung disease, in response to moderate physical exertion, with or without treatment, and those with acute episodes of severe dyspnea (e.g., asthma).

Connective tissue disease: patients with systemic lupus erythematosus, polymyositis, mixed connective tissue disease, rheumatic polymyalgia and moderate or severe rheumatoid arthritis.

Peptic ulcer: patients needing or who have needed treatment due to gastric or duodenal ulcer disease.

Mild liver disease: patients with chronic hepatitis or cirrhosis without portal hypertension.

Diabetes: diabetic patients treated with oral antidiabetic drugs or insulin, in the absence of retinopathy, neuropathy or kidney disease.

Hemiplegia: patients with established hemiplegia or paraplegia secondary to stroke or any other process.

Moderate-severe kidney disease: patients with plasma creatinine > 3 mg/dL (moderate) and patients with end-stage chronic renal failure, subjected to dialysis or with kidney transplantation (severe).

Diabetes with target organ damage: diabetic patients with retinopathy, neuropathy and/or kidney disease.

Tumors, leukemia, lymphoma: patients with any type of hematological neoplasm (myeloma, leukemia, lymphoma, Hodgkin lymphoma, macroglobulinemia, etc.) or presenting a solid tumor without evidence of metastasis.

Moderate-severe liver disease: patients with cirrhosis and portal hypertension.

Metastatic solid tumor disease: patients with tumors of any location, and with evidence of metastasis.

AIDS: patients diagnosed with acquired immunodeficiency syndrome.

Annex 9. SELECTING A TARGET KT ACCORDING TO BSA BASED ON EQ. (1).


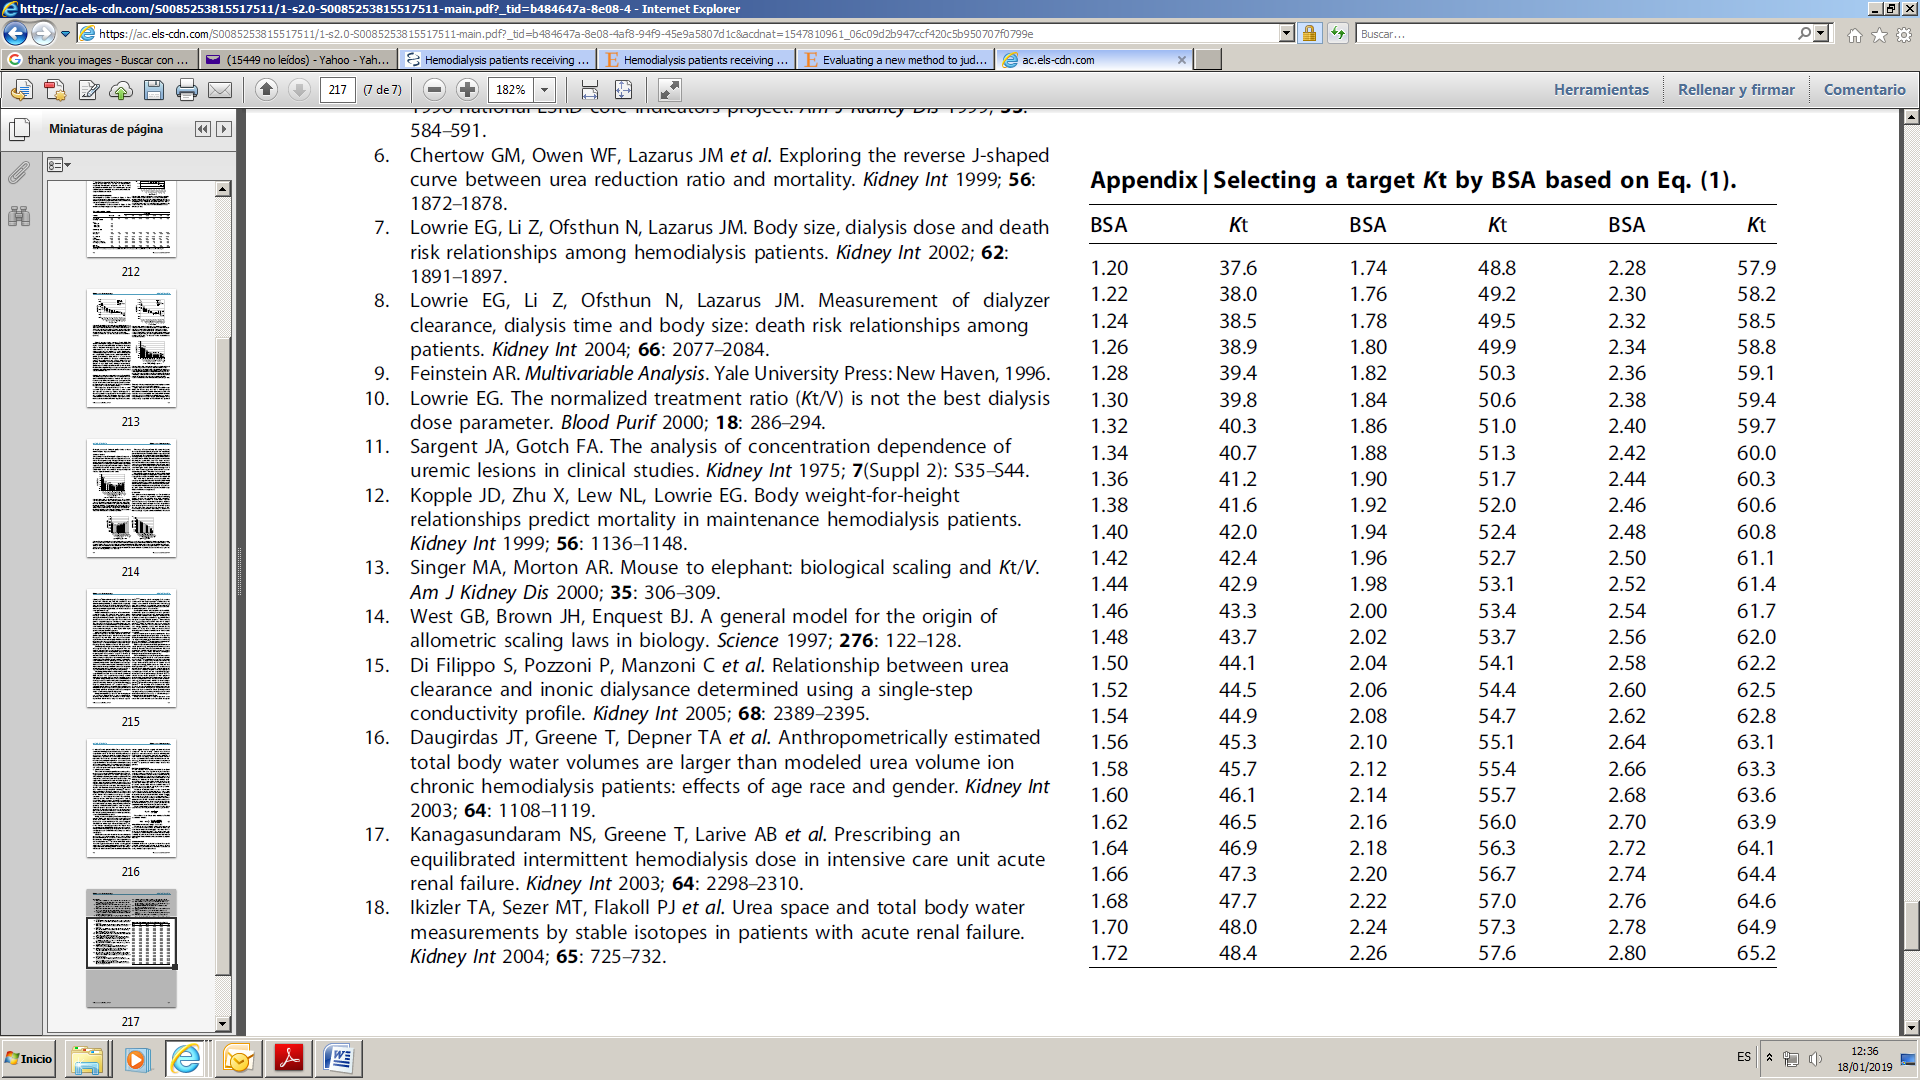


Annex 10. LIST OF ADVERSE EVENTS

| ADVERSE EVENTS | Failure / cause | Preventive measures |
| --- | --- | --- |
| Hypotension  Cramps  Chest pain  Arrhythmias  Nausea/vomiting | Error on weighing the patient. No weighing  No direct monitoring of the weight of the patient  Scale error/wrong annotation on dialysis graph | Healthcare staff should always weigh patient / weigh again in case of doubt / record weight at time of weighing / always try to weigh patient before and after / scale maintenance / check calculation of weight |
| Excessive ultrafiltration | Do not program hourly UF > 10‑13 ml/kg/hour  Always reflect maximum UF on HD treatment record |
| Inadequate dry weight | Check symptoms of volume overload / depletion in each dialysis session and detect signs suggesting the need for modifying dry weight |
| Error in calculating weight | Always check before programming the HD machine and thereafter hourly |
| Food intolerance during dialysis | Do not offer food in dialysis to patients unable to tolerate it |
| Administration of hypotensive agents before dialysis | Do not prescribe antihypertensive drugs before dialysis |
| Dialysis with high DF temperature | Adjust DF temperature between 35.5°C and 36.5°C |
| Dialysis with low conductivity | Adjust sodium of the DF  Do not dialyze with conductivity < 13.7 mS/cm |
| Transient disconnection during HD | Return all the volume before disconnection  Weigh again and repeat calculation of UF |
| Arterial hypertension | Inadequate dry weight | Check symptoms of volume overload / depletion in each dialysis session and detect signs suggesting modification of dry weight / considered bioimpedance dry weight estimation |
| Inadequate antihypertensive treatment | Adjust hypotensive medication / avoid hypotensive drug use before dialysis |
| Infection related to the vascular access | Deficient hand hygiene / deficient asepsis in connection and disconnection / error in manipulation of the vascular access (AVF and catheters) | Staff training / wash arm or puncture site ~~in leg~~ ( **eliminarlo Tambien de la version en castellano ~~)~~** with water and soap / disinfection of the zone / use stepwise puncture method / in manipulation of catheters: use of mask by both patient and staff, correct hand hygiene and use of gloves, with sterile field. The Manipulation of the ends of the dialysis lines to be connected to the catheter should be made as carefully as possible in order to avoid contamination |
| Venous extravasation or hematomas | Defective staff technique / inadequate attention / hurry / insufficient training | Staff training / take into account caliber, needle length, maximum pump blood flow and duration of the HD session / use arterial needle with fenestration / use needle of smallest available caliber in first punctures / in difficult puncture or first punctures, check canalization using saline solution / use stepwise puncture method / always use two fingers for hemostasis after withdrawing needle: one to compress the external orifice and the other to compress the internal orifice |
| Acute complications of AVF (thrombosis) | Failure in monitoring of the vascular access / defective staff technique / inadequate patient monitoring / | Staff training / Establish new generation programs and systems for monitoring of the vascular access (ultrasound, transonic)/puncture techniques that increase survival of the AVF: “arterial” puncture in anterograde direction / orientation of the bevel facing upwards / no rotation of the needle (180 degrees) in cannulation / use stepwise puncture method |
| Catheter dysfunction/rupture | Defective staff technique / inadequate attention / hurry / insufficient training / inadequate anticoagulation / inadequate patient care training | Staff training / patient training / correct sealing with heparin |
| Needle detachment | Defective needle fixation to skin, poorly adhering tape, traction of circuit lines or sudden movement of the extremity with the AVF. | Adequately affix the needles and blood lines with a sufficient margin of space to avoid hazardous traction. Always keep the extremity in view and immobilized, if necessary. If a needle becomes detached, compress the bleeding point, stop the blood pump if this has not occurred automatically, and clamp the corresponding line; estimate the blood volume lost and check the hemodynamic stability of the patient |
| Excessive post-HD bleeding | AV puncture failure (repeated punctures in the same zone)  Defective compression / hurry | Staff training / use stepwise puncture method / each needle should be withdrawn approximately at the same angle as it was inserted / always use two fingers for hemostasis after withdrawing needle: one to compress the external orifice and the other to compress the internal orifice / first remove the “venous” needle, perform corresponding hemostasis at this level, and then remove the “arterial” needle / manual compression is to be maintained for at least 10 minutes / patient training in self-care |
| Coagulation of the system | No following of medical instructions / insufficient heparin /  inadequate monitoring of session | Adequate anticoagulation during HD / adequate monitoring of venous alarms during the session, intervening early before complete circuit coagulation occurs |
| Allergic reactions | Failure in allergy check | Record allergies in visible way, and check such allergies |
| HCV/HBV or HIV seroconversion | No compliance with universal measures of caution / inadequate disinfection of monitors / no external cleaning | Strict compliance with universal measures of caution / do not use multidose vials |
| Accidental falls | Insufficient care of dependent patient / poor assessment of degree of dependency / inadequate staff ratio for that type of patient | Adequate identification of the level of dependency of the patients and healthcare staff care while in the unit / barriers in the beds / monitoring of post-HD orthostatic hypotension / evaluation of gait and vision |
| Death during or after HD | Technical and/or human error | Optimize the dialysis dose, monitor potassium levels, time of treatment no less than 4 hours, UF < 5.7% of the postdialysis weight |
| Hemolysis | Technical and/or human error / dialysis solution / monitor maintenance failure | Adequate maintenance of monitors / adequate maintenance of water plant / monitoring of dialysis fluid |
| Aluminum intoxication | Technical and/or human error / water plant control failure / water plant maintenance and monitoring failure / medical supervision failure | Adequate maintenance of water plant / monitoring of aluminum levels in water for dialysis |
| Gas embolism | Technical and/or human error. No use of air detectors of the monitor / recovery without saline solution / inadequate central catheter disconnection | Always use the monitor air detectors / recovery with saline solution |
| Disequilibrium syndrome | Inadequate programming of the dialysis session. No prescription of slow dialysis, with low flow and short times, with frequent intervals in the first dialyses | Prescription of three dialyses on consecutive days with gradual increase in time and blood flow with the use of small size surface dialyzers |
| Reaction to pyrogens | Technical and/or human error/ water plant control failure | Adequate maintenance of water plant |
